# Supplementary material for: Cerebrospinal fluid metabolomics reveals altered waste clearance and accelerated aging in HIV patients with neurocognitive impairment
Source: PubMed Central journal article supplement — AIDS. 2014 Jun 25;28(11):1579–91. doi: 10.1097/QAD.0000000000000303 (PMC4086755; doi:10.1097/qad.0000000000000303), 2014-06-25

## **Supplemental Methods:**

### *Metabolomic profiling*

Metabolomic profiling was performed by Metabolon (Durham, NC) as previously described [1, 2] using ultra high performance liquid chromatography and tandem mass spectrometry (UHLC/MS/MS<sup>2</sup>) and gas chromatography (GC)/MS. CSF samples were extracted using the automated MicroLab STAR® system Hamilton Company, Salt Lake City, Utah), divided into two fractions for UHLC/MS/MS<sup>2</sup> and GC/MS analysis, placed briefly on a TurboVap® (Zymark), and then frozen and vacuum dried. LC/MS extracts were reconstituted in acidic (eluted using water and methanol both containing 0.1% Formic acid) or basic conditions (eluted using water and methanol containing 6.5mM Ammonium Bicarbonate) and run on a Waters ACQUITY UPLC and a Thermo-Finnigan LTQ mass spectrometer, which consisted of an electrospray ionization (ESI) source and linear ion-trap (LIT) mass analyzer. The MS analysis alternated between MS and data-dependent MS<sup>2</sup> scans using dynamic exclusion. GC/MS samples were re-dried under vacuum desiccation for a minimum of 24 hours, derivatized under dried nitrogen using bistrimethyl-silyl-trifluoroacetamide (BSTFA), run on 5% phenyl column (temperature ramp from 40° to 300° C in 16 minutes), and analyzed on a Thermo-Finnigan Trace DSQ fast-scanning single-quadrupole mass spectrometer using electron impact ionization. For quality assurance (QA) and quality control (QC) purposes, additional samples are included in each day's analysis including two matrix samples (one of pooled human plasma and one of pooled CSF from study samples), an aliquot of pure water, and an aliquot of each solvent used in the extraction. A selection of QC compounds was also added to every sample including a derivatization standard, an internal standard, and a recovery standard. Raw MS data files were loaded into a relational database, examined, and appropriate QC limits imposed. Peaks were

identified using Metabolon's proprietary peak integration software, and compounds were identified by comparison to library entries (>1000 compounds) of purified standards or recurrent unknown entities. The combination of chromatographic properties and mass spectra gave an indication of a match to the specific compound or an isobaric entity. Unnamed metabolites were identified by virtue of their recurrent nature (both chromatographic and mass spectral). Quality control and curation processes were performed to ensure accurate and consistent identification of true chemical entities, and to remove those representing system artifacts, misassignments, and background noise using a proprietary visualization and interpretation software.

### *Neurocognitive testing*

All HIV subjects were administered a comprehensive test battery designed to assess neurocognitive function as previously described [3]. Tests were identical for all CHARTER and NNTC sites. Seven categories of neurocognitive function were tested including motor skills (Grooved Pegboard Test, dominant and nondominant hand performances), SIP (WAIS-III Digit Symbol and Symbol Search subtests and Trail Making Test Part A), attention (WAIS-III Letter-Number Sequencing, PASAT-50), learning (Hopkins Verbal Learning Test - Revised, Total Trial 1-3 Recall and Brief Visuospatial Memory Test-Revised), memory (HVLTR Delayed Recall, BVMI-R Delayed Recall), language fluency (Controlled Oral Word Association Test), and executive function (Wisconsin Card Sorting Test, perseverative responses and TMT Part B). This battery was designed to be brief and repeatable to facilitate multiple assessments over a relatively brief time. Performance on each test generated a raw score, which was converted to a demographically corrected T score as previously described [3]. T scores were then grouped by cognitive domain, and a global T score was generated from the individual T scores. T scores

correlate negatively with severity of neurocognitive impairment, with values  $<40$  signifying impairment.

## References

1. Cassol E, Misra V, Holman A, Kamat A, Morgello S, Gabuzda D. Plasma metabolomics identifies lipid abnormalities linked to markers of inflammation, microbial translocation, and hepatic function in HIV patients receiving protease inhibitors. *BMC Infect Dis* 2013,**13**:203.
2. Evans AM, DeHaven CD, Barrett T, Mitchell M, Milgram E. Integrated, nontargeted ultrahigh performance liquid chromatography/electrospray ionization tandem mass spectrometry platform for the identification and relative quantification of the small-molecule complement of biological systems. *Anal Chem* 2009,**81**:6656-6667.
3. Woods SP, Rippeth JD, Frol AB, Levy JK, Ryan E, Soukup VM, *et al.* Interrater reliability of clinical ratings and neurocognitive diagnoses in HIV. *J Clin Exp Neuropsychol* 2004,**26**:759-778.

**Supplemental Digital Content 2.** Clinical and demographic characteristics of HIV subjects in study cohorts

|                                   | <b>HIV on ART (n=36)</b>           | <b>HIV no ART (n=10)</b> |                      |
|-----------------------------------|------------------------------------|--------------------------|----------------------|
| <b>Demographics</b>               | Age (years)*                       | 45 (41-50)               | 44 (39-49)           |
|                                   | Gender (male)                      | 86%                      | 60%                  |
|                                   | Race (African American)            | 53%                      | 40%                  |
|                                   | HCV co-infection (seropositive)    | 66%                      | 63%                  |
| <b>ART Class</b>                  | Protease Inhibitor Based           | 72%                      | 0%                   |
|                                   | NNRTI Based                        | 28%                      | 0%                   |
|                                   | D-drug                             | 31%                      | 0%                   |
| <b>Clinical Parameters - HIV</b>  | CD4 T-cell count (cells/ul)*       | 141 (39-287)             | 70 (23-218)          |
|                                   | Nadir CD4 T-cell count (cells/ul)* | 30 (7-90)                | 34 (11-153)          |
|                                   | Plasma HIV RNA (copies/ml)*        | 268 (50-11730)           | 76937 (31725-678174) |
|                                   | Plasma HIV RNA <400 copies/ml      | 56%                      | 0%                   |
|                                   | CSF HIV RNA (copies/ml)*           | 50 (50-196)              | 328 (87-8761)        |
|                                   | CSF HIV RNA <50 copies/ml          | 83%                      | 10%                  |
| <b>HAND Diagnosis</b>             | No NCI                             | 33%                      | 30%                  |
|                                   | ANI                                | 25%                      | 0%                   |
|                                   | MND                                | 14%                      | 10%                  |
|                                   | HAD                                | 17%                      | 20%                  |
|                                   | NPI-O                              | 11%                      | 30%                  |
|                                   | Unable to assign                   | 0%                       | 10%                  |
| <b>Neurocognitive Test Scores</b> | Global T*                          | 43 (35-49)               | 41 (37-46)           |
|                                   | Motor T*                           | 38 (31-49)               | 33 (29-45)           |
|                                   | SIP T*                             | 45 (36-54)               | 46 (42-49)           |
|                                   | Memory-encoding T*                 | 40 (28-48)               | 37 (31-42)           |
|                                   | Memory-retrieval T*                | 42 (28-52)               | 38 (27-44)           |
|                                   | Fluency T*                         | 49 (42-56)               | 47 (37-56)           |
|                                   | Executive Function T*              | 44 (38-50)               | 42 (38-47)           |

**Supplemental Digital Content 3 (Figure).** Untargeted metabolite profiling of CSF from 100 HIV and control subjects detected over 200 metabolites. Schematic of strategy used to identify CSF metabolites altered in the HIV and Aging cohorts. BCAA, branched chain amino acids; MCFA, medium chain fatty acids; LCFA, long chain fatty acids.

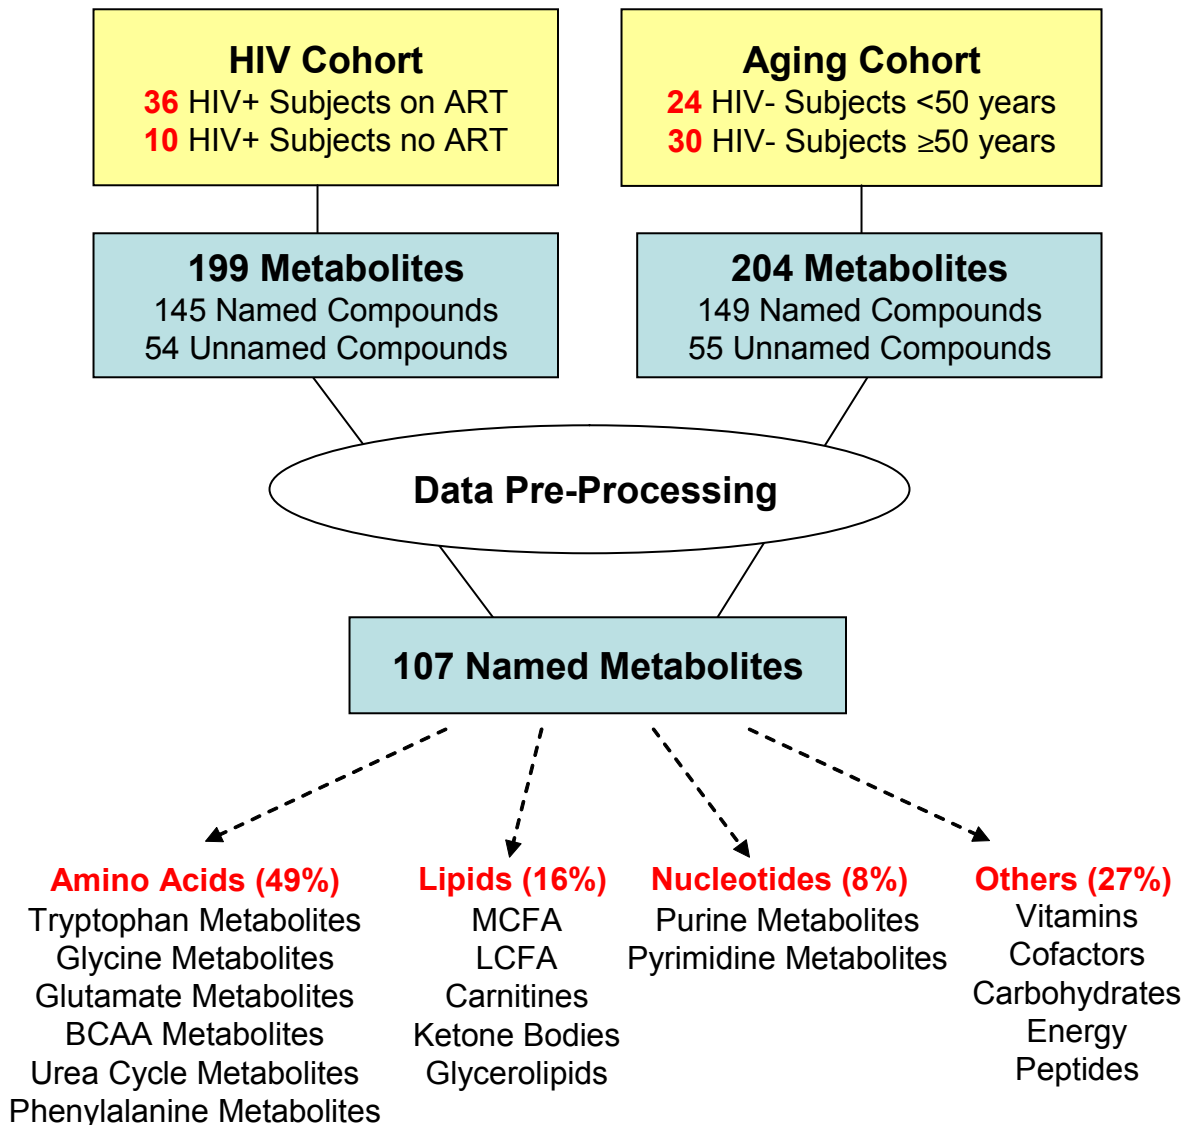

**Supplemental Digital Content 4. Alterations in the CSF metabolome of HIV patients on ART compared to HIV-negative controls matched by age and gender.** Shown is the total dataset of metabolites detected across HIV and Aging cohorts following data pre-processing. Significantly altered metabolites were defined by a fold change (FC) >1.2, p-value <0.01 and FDR<sub>0.1</sub>.

| BIOCHEMICAL                                    | SUPER_PATHWAY          | SUB_PATHWAY                                          | FC    | p-value | q-value |
|------------------------------------------------|------------------------|------------------------------------------------------|-------|---------|---------|
| 3-ureidopropionate                             | Amino acid             | Alanine and aspartate metabolism                     | -1.18 | 0.281   | 0.286   |
| alanine                                        | Amino acid             | Alanine and aspartate metabolism                     | 1.08  | 0.274   | 0.282   |
| asparagine                                     | Amino acid             | Alanine and aspartate metabolism                     | 1.11  | 0.374   | 0.348   |
| N-acetylalanine                                | Amino acid             | Alanine and aspartate metabolism                     | 1.11  | 0.052   | 0.094   |
| N-acetylaspartate (NAA)                        | Amino acid             | Alanine and aspartate metabolism                     | 2.10  | 0.001   | 0.004   |
| 2-aminobutyrate                                | Amino acid             | Butanoate metabolism                                 | -1.17 | 0.111   | 0.154   |
| creatine                                       | Amino acid             | Creatine metabolism                                  | 1.01  | 0.733   | 0.511   |
| creatinine                                     | Amino acid             | Creatine metabolism                                  | -1.01 | 0.862   | 0.552   |
| 2-hydroxybutyrate (AHB)                        | Amino acid             | Cysteine, methionine, SAM, taurine metabolism        | -1.16 | 0.232   | 0.254   |
| methionine                                     | Amino acid             | Cysteine, methionine, SAM, taurine metabolism        | -1.08 | 0.059   | 0.103   |
| glutamate                                      | Amino acid             | Glutamate metabolism                                 | 1.83  | 0.005   | 0.017   |
| glutamine                                      | Amino acid             | Glutamate metabolism                                 | 1.12  | 0.184   | 0.216   |
| N-acetyl-aspartyl-glutamate (NAAG)             | Amino acid             | Glutamate metabolism                                 | 1.37  | 0.015   | 0.039   |
| 5-oxoproline                                   | Amino acid             | Glutathione metabolism                               | -1.26 | 0.014   | 0.037   |
| betaine                                        | Amino acid             | Glycine, serine and threonine metabolism             | 1.15  | 0.011   | 0.032   |
| glycine                                        | Amino acid             | Glycine, serine and threonine metabolism             | 1.12  | 0.324   | 0.265   |
| N-acetyserine                                  | Amino acid             | Glycine, serine and threonine metabolism             | 1.10  | 0.087   | 0.133   |
| N-acetylthreonine                              | Amino acid             | Glycine, serine and threonine metabolism             | 1.04  | 0.467   | 0.400   |
| serine                                         | Amino acid             | Glycine, serine and threonine metabolism             | 1.08  | 0.302   | 0.301   |
| threonine                                      | Amino acid             | Glycine, serine and threonine metabolism             | 1.04  | 0.655   | 0.483   |
| 4-acetamidobutanoate                           | Amino acid             | Guandinio and acetamido metabolism                   | 1.11  | 0.106   | 0.150   |
| N-acetyl-3-methylhistidine                     | Amino acid             | Histidine metabolism                                 | 1.63  | <0.001  | <0.001  |
| lysine                                         | Amino acid             | Lysine metabolism                                    | -1.17 | 0.246   | 0.263   |
| 3-(4-hydroxyphenyl)lactate                     | Amino acid             | Phenylalanine & tyrosine metabolism                  | 1.30  | 0.007   | 0.023   |
| p-cresol sulfate                               | Amino acid             | Phenylalanine & tyrosine metabolism                  | 1.61  | <0.001  | <0.001  |
| phenol sulfate                                 | Amino acid             | Phenylalanine & tyrosine metabolism                  | 1.18  | 0.324   | 0.316   |
| phenylacetylglutamine                          | Amino acid             | Phenylalanine & tyrosine metabolism                  | 1.77  | <0.001  | <0.001  |
| phenylalanine                                  | Amino acid             | Phenylalanine & tyrosine metabolism                  | -1.09 | 0.276   | 0.283   |
| tyrosine                                       | Amino acid             | Phenylalanine & tyrosine metabolism                  | 1.07  | 0.302   | 0.301   |
| 5-methylthioadenosine (MTA)                    | Amino acid             | Polyamine metabolism                                 | -1.28 | 0.017   | 0.042   |
| 5-hydroxyindoleacetate                         | Amino acid             | Tryptophan metabolism                                | 1.09  | 0.532   | 0.432   |
| C-glycosyltryptophan*                          | Amino acid             | Tryptophan metabolism                                | 1.10  | 0.088   | 0.134   |
| kynurenine                                     | Amino acid             | Tryptophan metabolism                                | 1.06  | 0.748   | 0.516   |
| tryptophan                                     | Amino acid             | Tryptophan metabolism                                | -1.01 | 0.819   | 0.539   |
| tryptophan betaine                             | Amino acid             | Tryptophan metabolism                                | 1.11  | 0.411   | 0.370   |
| arginine                                       | Amino acid             | Urea cycle; arginine-, proline-, metabolism          | 1.07  | 0.255   | 0.270   |
| dimethylarginine (SDMA + ADMA)                 | Amino acid             | Urea cycle; arginine-, proline-, metabolism          | 1.02  | 0.687   | 0.495   |
| proline                                        | Amino acid             | Urea cycle; arginine-, proline-, metabolism          | 1.81  | <0.001  | <0.001  |
| trans-4-hydroxyproline                         | Amino acid             | Urea cycle; arginine-, proline-, metabolism          | 1.32  | 0.112   | 0.155   |
| urea                                           | Amino acid             | Urea cycle; arginine-, proline-, metabolism          | -1.05 | 0.598   | 0.461   |
| 3-hydroxy-2-ethylpropionate                    | Amino acid             | Valine, leucine and isoleucine metabolism            | -1.55 | 0.016   | 0.040   |
| 3-hydroxyisobutyrate                           | Amino acid             | Valine, leucine and isoleucine metabolism            | 1.01  | 0.861   | 0.551   |
| 3-methyl-2-oxobutyrate                         | Amino acid             | Valine, leucine and isoleucine metabolism            | -1.19 | 0.014   | 0.037   |
| 3-methyl-2-oxovalerate                         | Amino acid             | Valine, leucine and isoleucine metabolism            | -1.06 | 0.470   | 0.402   |
| 4-methyl-2-oxopentanoate                       | Amino acid             | Valine, leucine and isoleucine metabolism            | -1.12 | 0.149   | 0.188   |
| alpha-hydroxyisovalerate                       | Amino acid             | Valine, leucine and isoleucine metabolism            | -1.17 | 0.221   | 0.246   |
| beta-hydroxyisovalerate                        | Amino acid             | Valine, leucine and isoleucine metabolism            | -1.01 | 0.873   | 0.555   |
| isobutyrylcarnitine                            | Amino acid             | Valine, leucine and isoleucine metabolism            | -1.15 | 0.121   | 0.162   |
| isoleucine                                     | Amino acid             | Valine, leucine and isoleucine metabolism            | 1.05  | 0.606   | 0.464   |
| leucine                                        | Amino acid             | Valine, leucine and isoleucine metabolism            | -1.01 | 0.827   | 0.542   |
| N-acetylvaline                                 | Amino acid             | Valine, leucine and isoleucine metabolism            | 1.04  | 0.653   | 0.483   |
| valine                                         | Amino acid             | Valine, leucine and isoleucine metabolism            | 1.00  | 0.962   | 0.579   |
| erythronate*                                   | Carbohydrate           | Aminosugars metabolism                               | -1.03 | 0.551   | 0.440   |
| N-acetylneuraminic acid                        | Carbohydrate           | Aminosugars metabolism                               | 1.12  | 0.157   | 0.195   |
| 1,3-dihydroxyacetone                           | Carbohydrate           | Glycolysis, gluconeogenesis, pyruvate metabolism     | -1.36 | 0.118   | 0.159   |
| 1,5-anhydroglucitol (1,5-AG)                   | Carbohydrate           | Glycolysis, gluconeogenesis, pyruvate metabolism     | 1.07  | 0.613   | 0.467   |
| glycerate                                      | Carbohydrate           | Glycolysis, gluconeogenesis, pyruvate metabolism     | 1.03  | 0.626   | 0.472   |
| lactate                                        | Carbohydrate           | Glycolysis, gluconeogenesis, pyruvate metabolism     | 1.11  | 0.025   | 0.053   |
| pyruvate                                       | Carbohydrate           | Glycolysis, gluconeogenesis, pyruvate metabolism     | 1.32  | 0.165   | 0.201   |
| arabinose                                      | Carbohydrate           | Nucleotide sugars, pentose metabolism                | 1.10  | 0.082   | 0.129   |
| arabitol                                       | Carbohydrate           | Nucleotide sugars, pentose metabolism                | -1.01 | 0.900   | 0.562   |
| gluconate                                      | Carbohydrate           | Nucleotide sugars, pentose metabolism                | -1.19 | 0.323   | 0.316   |
| ribitol                                        | Carbohydrate           | Nucleotide sugars, pentose metabolism                | -1.01 | 0.890   | 0.560   |
| threitol                                       | Carbohydrate           | Nucleotide sugars, pentose metabolism                | 1.15  | 0.133   | 0.173   |
| xylitol                                        | Carbohydrate           | Nucleotide sugars, pentose metabolism                | 1.08  | 0.643   | 0.479   |
| xylonate                                       | Carbohydrate           | Nucleotide sugars, pentose metabolism                | -1.05 | 0.521   | 0.427   |
| xylose                                         | Carbohydrate           | Nucleotide sugars, pentose metabolism                | 1.26  | 0.051   | 0.093   |
| arabonate                                      | Cofactors and vitamins | Ascorbate and aldarate metabolism                    | 1.09  | 0.303   | 0.302   |
| threonate                                      | Cofactors and vitamins | Ascorbate and aldarate metabolism                    | 1.21  | 0.017   | 0.042   |
| pantothenate                                   | Cofactors and vitamins | Pantothenate and CoA metabolism                      | 1.22  | 0.091   | 0.137   |
| citrate                                        | Energy                 | Krebs cycle                                          | -1.10 | 0.122   | 0.162   |
| malate                                         | Energy                 | Krebs cycle                                          | 2.75  | <0.001  | <0.001  |
| succinate                                      | Energy                 | Krebs cycle                                          | 1.62  | <0.001  | <0.001  |
| succinylcarnitine                              | Energy                 | Krebs cycle                                          | -1.01 | 0.899   | 0.562   |
| 3-dehydrocarnitine*                            | Lipid                  | Carnitine metabolism                                 | 1.28  | 0.002   | 0.008   |
| acetylcarnitine                                | Lipid                  | Carnitine metabolism                                 | 1.32  | 0.102   | 0.147   |
| carnitine                                      | Lipid                  | Carnitine metabolism                                 | -1.02 | 0.753   | 0.518   |
| propionylcarnitine                             | Lipid                  | Fatty acid metabolism (also BCAA metabolism)         | 1.24  | 0.030   | 0.061   |
| 3-hydroxypropanoate                            | Lipid                  | Fatty acid, monohydroxy                              | 1.25  | 0.075   | 0.121   |
| choline                                        | Lipid                  | Glycerolipid metabolism                              | 1.02  | 0.742   | 0.514   |
| glycerol                                       | Lipid                  | Glycerolipid metabolism                              | 1.01  | 0.868   | 0.553   |
| glycerol 3-phosphate (G3P)                     | Lipid                  | Glycerolipid metabolism                              | 1.41  | 0.015   | 0.039   |
| myo-inositol                                   | Lipid                  | Inositol metabolism                                  | 1.15  | 0.119   | 0.160   |
| 1,2-propanediol                                | Lipid                  | Ketone bodies                                        | 2.97  | <0.001  | <0.001  |
| 3-hydroxybutyrate (BHBA)                       | Lipid                  | Ketone bodies                                        | 2.17  | <0.001  | <0.001  |
| acetoacetate                                   | Lipid                  | Ketone bodies                                        | 1.11  | 0.937   | 0.673   |
| arachidonate (20:4n6)                          | Lipid                  | Long chain fatty acid                                | 1.08  | 0.518   | 0.425   |
| caprylate (8:0)                                | Lipid                  | Medium chain fatty acid                              | 1.27  | 0.050   | 0.091   |
| 1-stearoylglycerol (1-monostearin)             | Lipid                  | Monooacylglycerol                                    | 1.31  | 0.293   | 0.295   |
| 7-alpha-hydroxy-3-oxo-4-cholestenoate (7-Hcca) | Lipid                  | Sterol/Steroid                                       | 1.06  | 0.524   | 0.428   |
| hypoxanthine                                   | Nucleotide             | Purine metabolism, (hypo)xanthine/inosine containing | 1.18  | 0.056   | 0.099   |
| inosine                                        | Nucleotide             | Purine metabolism, (hypo)xanthine/inosine containing | 1.10  | 0.179   | 0.213   |
| xanthine                                       | Nucleotide             | Purine metabolism, (hypo)xanthine/inosine containing | 1.13  | 0.031   | 0.063   |
| adenine                                        | Nucleotide             | Purine metabolism, adenine containing                | 1.29  | 0.025   | 0.053   |
| N6-carbamoylthreonyladenosine                  | Nucleotide             | Purine metabolism, guanine containing                | 1.15  | 0.077   | 0.123   |
| urate                                          | Nucleotide             | Purine metabolism, urate metabolism                  | 1.05  | 0.470   | 0.402   |
| cytidine                                       | Nucleotide             | Pyrimidine metabolism, cytidine containing           | 1.01  | 0.892   | 0.560   |
| pseudouridine                                  | Nucleotide             | Pyrimidine metabolism, uracil containing             | 1.03  | 0.642   | 0.478   |
| uridine                                        | Nucleotide             | Pyrimidine metabolism, uracil containing             | 1.00  | 0.922   | 0.568   |
| cyclo(leu-pro)                                 | Peptide                | Dipeptide                                            | 1.09  | 0.470   | 0.402   |
| homocarnosine                                  | Peptide                | Dipeptide derivative                                 | 2.29  | <0.001  | <0.001  |
| X - 03056                                      | unnamed                |                                                      | 1.05  | 0.555   | 0.442   |
| X - 08893                                      | unnamed                |                                                      | -2.67 | <0.001  | <0.001  |
| X - 11396                                      | unnamed                |                                                      | -1.01 | 0.942   | 0.574   |
| X - 11564                                      | unnamed                |                                                      | 1.02  | 0.788   | 0.529   |
| X - 11593                                      | unnamed                |                                                      | 1.08  | 0.174   | 0.209   |
| X - 11687                                      | unnamed                |                                                      | 1.00  | 0.957   | 0.577   |
| X - 11787                                      | unnamed                |                                                      | 1.19  | 0.005   | 0.017   |
| X - 11977                                      | unnamed                |                                                      | 1.88  | <0.001  | <0.001  |
| X - 12048                                      | unnamed                |                                                      | 24.73 | <0.001  | <0.001  |
| X - 12100                                      | unnamed                |                                                      | -1.14 | 0.195   | 0.225   |
| X - 12364                                      | unnamed                |                                                      | 1.24  | 0.024   | 0.052   |

|           |         |       |        |        |
|-----------|---------|-------|--------|--------|
| X - 12741 | unnamed | 2.50  | 0.013  | 0.035  |
| X - 12776 | unnamed | 1.04  | 0.231  | 0.253  |
| X - 12944 | unnamed | -1.03 | 0.726  | 0.509  |
| X - 12957 | unnamed | 1.04  | 0.703  | 0.501  |
| X - 14307 | unnamed | 32.00 | <0.001 | <0.001 |
| X - 14015 | unnamed | 6.46  | <0.001 | <0.001 |
| X - 14588 | unnamed | 1.03  | 0.278  | 0.284  |
| X - 14659 | unnamed | 1.04  | 0.636  | 0.476  |
| X - 15562 | unnamed | 1.16  | 0.374  | 0.348  |
| X - 15563 | unnamed | 1.23  | 0.156  | 0.194  |
| X - 15664 | unnamed | -1.10 | 0.497  | 0.415  |
| X - 15824 | unnamed | 11.99 | <0.001 | <0.001 |
| X - 15825 | unnamed | 7.39  | <0.001 | <0.001 |
| X - 16103 | unnamed | 1.02  | 0.660  | 0.485  |
| X - 16206 | unnamed | 1.04  | 0.109  | 0.153  |
| X - 16271 | unnamed | 1.56  | 0.024  | 0.052  |
| X - 16693 | unnamed | -1.00 | 0.972  | 0.581  |
| X - 16932 | unnamed | -1.13 | 0.379  | 0.351  |
| X - 16938 | unnamed | -1.03 | 0.747  | 0.516  |
| X - 17299 | unnamed | 1.04  | 0.688  | 0.496  |
| X - 17564 | unnamed | 1.00  | 0.984  | 0.584  |
| X - 17762 | unnamed | 1.02  | 0.467  | 0.400  |
| X - 18153 | unnamed | 3.65  | <0.001 | <0.001 |
| X - 18554 | unnamed | 2.17  | <0.001 | <0.001 |
| X - 18538 | unnamed | 1.29  | <0.001 | <0.001 |
| X - 19437 | unnamed | 1.15  | 0.025  | 0.053  |



**Supplemental Digital Content 5 (Figure).** Metabolites altered in the CSF metabolome of HIV subjects on ART compared to HIV-negative controls. A) Volcano plot of metabolites altered (FC<1.2, p<0.01, FDR<10%) in HIV subjects on ART (n = 36) compared to age- and gender-matched HIV-negative controls (n=36). B) Venn diagram depicting overlap between CSF metabolites altered (FC<1.2, p<0.05, FDR<10%) in HIV subjects on ART (n=36) vs. HIV subjects not on ART (n=10).

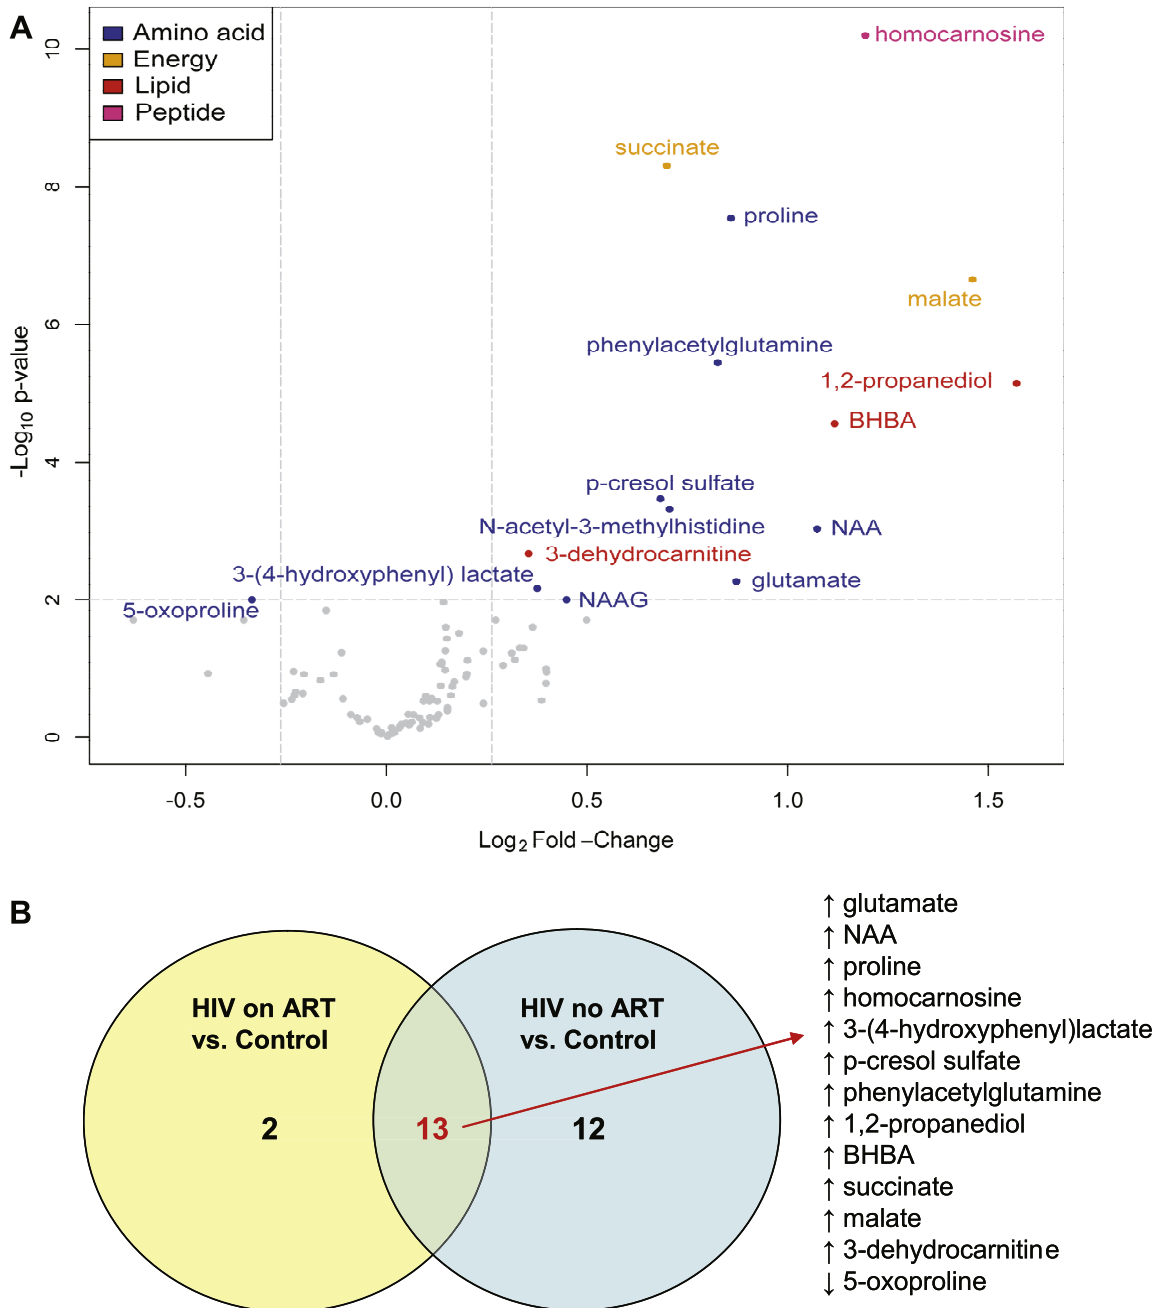

**Supplemental Digital Content 6.** Alterations in the CSF metabolome of HIV patient CSF VL<50 copies/ml) compared to HIV-negative controls matched by age and gender pre-processing. Significantly altered metabolites were defined by a fold change (FC)

| BIOCHEMICAL                        | SUPER_PATHWAY |
|------------------------------------|---------------|
| 3-ureidopropionate                 | Amino acid    |
| alanine                            | Amino acid    |
| asparagine                         | Amino acid    |
| N-acetylalanine                    | Amino acid    |
| N-acetylaspartate (NAA)            | Amino acid    |
| 2-aminobutyrate                    | Amino acid    |
| creatine                           | Amino acid    |
| creatinine                         | Amino acid    |
| 2-hydroxybutyrate (AHB)            | Amino acid    |
| methionine                         | Amino acid    |
| glutamate                          | Amino acid    |
| glutamine                          | Amino acid    |
| N-acetyl-aspartyl-glutamate (NAAG) | Amino acid    |
| 5-oxoproline                       | Amino acid    |
| betaine                            | Amino acid    |
| glycine                            | Amino acid    |
| N-acetylserine                     | Amino acid    |
| N-acetylthreonine                  | Amino acid    |
| serine                             | Amino acid    |
| threonine                          | Amino acid    |
| 4-acetamidobutanoate               | Amino acid    |
| N-acetyl-3-methylhistidine*        | Amino acid    |
| lysine                             | Amino acid    |
| 3-(4-hydroxyphenyl)lactate         | Amino acid    |
| p-cresol sulfate                   | Amino acid    |
| phenol sulfate                     | Amino acid    |
| phenylacetylglutamine              | Amino acid    |
| phenylalanine                      | Amino acid    |
| tyrosine                           | Amino acid    |
| 5-methylthioadenosine (MTA)        | Amino acid    |
| 5-hydroxyindoleacetate             | Amino acid    |
| C-glycosyltryptophan*              | Amino acid    |
| kynurenine                         | Amino acid    |
| tryptophan                         | Amino acid    |
| tryptophan betaine                 | Amino acid    |
| arginine                           | Amino acid    |
| dimethylarginine (SDMA + ADMA)     | Amino acid    |
| proline                            | Amino acid    |
| trans-4-hydroxyproline             | Amino acid    |
| urea                               | Amino acid    |
| 3-hydroxy-2-ethylpropionate        | Amino acid    |
| 3-hydroxyisobutyrate               | Amino acid    |
| 3-methyl-2-oxobutyrate             | Amino acid    |

|                              |                        |
|------------------------------|------------------------|
| 3-methyl-2-oxovalerate       | Amino acid             |
| 4-methyl-2-oxopentanoate     | Amino acid             |
| alpha-hydroxyisovalerate     | Amino acid             |
| beta-hydroxyisovalerate      | Amino acid             |
| isobutyrylcarnitine          | Amino acid             |
| isoleucine                   | Amino acid             |
| leucine                      | Amino acid             |
| N-acetylvaline               | Amino acid             |
| valine                       | Amino acid             |
| erythronate*                 | Carbohydrate           |
| N-acetylneuraminate          | Carbohydrate           |
| fructose                     | Carbohydrate           |
| mannitol                     | Carbohydrate           |
| mannose                      | Carbohydrate           |
| sorbitol                     | Carbohydrate           |
| 1,3-dihydroxyacetone         | Carbohydrate           |
| 1,5-anhydroglucitol (1,5-AG) | Carbohydrate           |
| glucose                      | Carbohydrate           |
| glycerate                    | Carbohydrate           |
| lactate                      | Carbohydrate           |
| pyruvate                     | Carbohydrate           |
| arabinose                    | Carbohydrate           |
| arabitol                     | Carbohydrate           |
| gluconate                    | Carbohydrate           |
| ribitol                      | Carbohydrate           |
| threitol                     | Carbohydrate           |
| xylitol                      | Carbohydrate           |
| xylonate                     | Carbohydrate           |
| xylose                       | Carbohydrate           |
| arabonate                    | Cofactors and vitamins |
| threonate                    | Cofactors and vitamins |
| pantothenate                 | Cofactors and vitamins |
| citrate                      | Energy                 |
| malate                       | Energy                 |
| succinate                    | Energy                 |
| succinylcarnitine            | Energy                 |
| 3-dehydrocarnitine*          | Lipid                  |
| acetylcarnitine              | Lipid                  |
| carnitine                    | Lipid                  |
| propionylcarnitine           | Lipid                  |
| 3-hydroxypropanoate          | Lipid                  |
| choline                      | Lipid                  |
| glycerol                     | Lipid                  |
| glycerol 3-phosphate (G3P)   | Lipid                  |
| myo-inositol                 | Lipid                  |
| 1,2-propanediol              | Lipid                  |
| 3-hydroxybutyrate (BHBA)     | Lipid                  |
| acetoacetate                 | Lipid                  |
| arachidonate (20:4n6)        | Lipid                  |
| caproate (6:0)               | Lipid                  |
| caprylate (8:0)              | Lipid                  |

|                                                       |                   |
|-------------------------------------------------------|-------------------|
| <b>1-stearoylglycerol (1-monostearin)</b>             | <b>Lipid</b>      |
| <b>7-alpha-hydroxy-3-oxo-4-cholestenoate (7-Hoca)</b> | <b>Lipid</b>      |
| <b>hypoxanthine</b>                                   | <b>Nucleotide</b> |
| <b>inosine</b>                                        | <b>Nucleotide</b> |
| <b>xanthine</b>                                       | <b>Nucleotide</b> |
| <b>adenine</b>                                        | <b>Nucleotide</b> |
| <b>N6-carbamoylthreonyladenosine</b>                  | <b>Nucleotide</b> |
| <b>urate</b>                                          | <b>Nucleotide</b> |
| <b>cytidine</b>                                       | <b>Nucleotide</b> |
| <b>pseudouridine</b>                                  | <b>Nucleotide</b> |
| <b>uridine</b>                                        | <b>Nucleotide</b> |
| <b>cyclo(leu-pro)</b>                                 | <b>Peptide</b>    |
| <b>homocarnosine</b>                                  | <b>Peptide</b>    |

s on stable ART (>2 years on ART) with maximally suppressed viral loads (n=10, plasma VL<50 copies/ml, der (n=10). Shown is the total dataset of metabolites detected across HIV and Aging cohorts following data >1.2, p-value <0.01 and FDR ≤0.1.

| <b>SUB_PATHWAY</b>                            | <b>FC</b> | <b>p-value</b> | <b>q-value</b> |
|-----------------------------------------------|-----------|----------------|----------------|
| Alanine and aspartate metabolism              | 1.09      | 0.584          | 0.456          |
| Alanine and aspartate metabolism              | 1.07      | 0.657          | 0.485          |
| Alanine and aspartate metabolism              | 1.13      | 0.577          | 0.453          |
| Alanine and aspartate metabolism              | 1.14      | 0.075          | 0.154          |
| Alanine and aspartate metabolism              | 2.16      | 0.080          | 0.157          |
| Butanoate metabolism                          | -1.37     | 0.103          | 0.175          |
| Creatine metabolism                           | -1.10     | 0.027          | 0.101          |
| Creatine metabolism                           | 1.10      | 0.287          | 0.323          |
| Cysteine, methionine, SAM, taurine metabolism | -1.22     | 0.423          | 0.383          |
| Cysteine, methionine, SAM, taurine metabolism | -1.21     | 0.017          | 0.076          |
| Glutamate metabolism                          | 1.93      | 0.007          | 0.043          |
| Glutamate metabolism                          | 1.27      | 0.242          | 0.296          |
| Glutamate metabolism                          | 1.91      | 0.068          | 0.148          |
| Glutathione metabolism                        | -1.54     | 0.023          | 0.092          |
| Glycine, serine and threonine metabolism      | 1.21      | 0.065          | 0.146          |
| Glycine, serine and threonine metabolism      | 1.21      | 0.181          | 0.253          |
| Glycine, serine and threonine metabolism      | 1.16      | 0.133          | 0.208          |
| Glycine, serine and threonine metabolism      | -1.01     | 0.898          | 0.563          |
| Glycine, serine and threonine metabolism      | 1.13      | 0.357          | 0.356          |
| Glycine, serine and threonine metabolism      | -1.22     | 0.198          | 0.266          |
| Guanidino and acetamido metabolism            | 1.23      | 0.039          | 0.119          |
| Histidine metabolism                          | 1.67      | 0.085          | 0.162          |
| Lysine metabolism                             | -1.79     | 0.057          | 0.139          |
| Phenylalanine & tyrosine metabolism           | 1.53      | 0.005          | 0.035          |
| Phenylalanine & tyrosine metabolism           | 2.10      | 0.006          | 0.042          |
| Phenylalanine & tyrosine metabolism           | 1.87      | 0.012          | 0.061          |
| Phenylalanine & tyrosine metabolism           | 1.94      | 0.001          | 0.009          |
| Phenylalanine & tyrosine metabolism           | -1.11     | 0.450          | 0.394          |
| Phenylalanine & tyrosine metabolism           | 1.05      | 0.723          | 0.509          |
| Polyamine metabolism                          | -1.16     | 0.352          | 0.353          |
| Tryptophan metabolism                         | 1.16      | 0.458          | 0.397          |
| Tryptophan metabolism                         | 1.09      | 0.431          | 0.386          |
| Tryptophan metabolism                         | 1.40      | 0.316          | 0.337          |
| Tryptophan metabolism                         | 1.04      | 0.778          | 0.528          |
| Tryptophan metabolism                         | 1.55      | 0.057          | 0.139          |
| Urea cycle; arginine-, proline-, metabolism   | -1.19     | 0.101          | 0.174          |
| Urea cycle; arginine-, proline-, metabolism   | -1.11     | 0.414          | 0.379          |
| Urea cycle; arginine-, proline-, metabolism   | 2.04      | <0.001         | 0.003          |
| Urea cycle; arginine-, proline-, metabolism   | -1.01     | 0.972          | 0.583          |
| Urea cycle; arginine-, proline-, metabolism   | -1.18     | 0.237          | 0.294          |
| Valine, leucine and isoleucine metabolism     | -1.52     | 0.254          | 0.304          |
| Valine, leucine and isoleucine metabolism     | -1.06     | 0.503          | 0.419          |
| Valine, leucine and isoleucine metabolism     | -1.14     | 0.392          | 0.369          |

|                                                              |       |        |       |
|--------------------------------------------------------------|-------|--------|-------|
| Valine, leucine and isoleucine metabolism                    | -1.01 | 0.918  | 0.569 |
| Valine, leucine and isoleucine metabolism                    | 1.01  | 0.912  | 0.567 |
| Valine, leucine and isoleucine metabolism                    | -1.01 | 0.975  | 0.583 |
| Valine, leucine and isoleucine metabolism                    | -1.16 | 0.357  | 0.355 |
| Valine, leucine and isoleucine metabolism                    | -1.17 | 0.321  | 0.340 |
| Valine, leucine and isoleucine metabolism                    | -1.12 | 0.534  | 0.434 |
| Valine, leucine and isoleucine metabolism                    | -1.01 | 0.911  | 0.567 |
| Valine, leucine and isoleucine metabolism                    | 1.38  | 0.076  | 0.155 |
| Valine, leucine and isoleucine metabolism                    | 1.01  | 0.934  | 0.573 |
| Aminosugars metabolism                                       | 1.02  | 0.843  | 0.548 |
| Aminosugars metabolism                                       | 1.18  | 0.277  | 0.317 |
| Fructose, mannose, galactose, starch, and sucrose metabolism | -1.41 | 0.100  | 0.173 |
| Fructose, mannose, galactose, starch, and sucrose metabolism | -1.37 | 0.361  | 0.357 |
| Fructose, mannose, galactose, starch, and sucrose metabolism | -1.23 | 0.041  | 0.123 |
| Fructose, mannose, galactose, starch, and sucrose metabolism | -1.34 | 0.041  | 0.122 |
| Glycolysis, gluconeogenesis, pyruvate metabolism             | -1.57 | 0.113  | 0.187 |
| Glycolysis, gluconeogenesis, pyruvate metabolism             | 1.12  | 0.670  | 0.491 |
| Glycolysis, gluconeogenesis, pyruvate metabolism             | -1.30 | 0.031  | 0.108 |
| Glycolysis, gluconeogenesis, pyruvate metabolism             | -1.05 | 0.666  | 0.489 |
| Glycolysis, gluconeogenesis, pyruvate metabolism             | 1.16  | 0.089  | 0.165 |
| Glycolysis, gluconeogenesis, pyruvate metabolism             | 1.45  | 0.391  | 0.369 |
| Nucleotide sugars, pentose metabolism                        | 1.18  | 0.140  | 0.216 |
| Nucleotide sugars, pentose metabolism                        | -1.04 | 0.810  | 0.538 |
| Nucleotide sugars, pentose metabolism                        | -1.17 | 0.564  | 0.448 |
| Nucleotide sugars, pentose metabolism                        | -1.17 | 0.128  | 0.203 |
| Nucleotide sugars, pentose metabolism                        | 1.05  | 0.779  | 0.528 |
| Nucleotide sugars, pentose metabolism                        | -1.12 | 0.712  | 0.505 |
| Nucleotide sugars, pentose metabolism                        | -1.19 | 0.211  | 0.276 |
| Nucleotide sugars, pentose metabolism                        | -1.02 | 0.930  | 0.572 |
| Ascorbate and aldarate metabolism                            | -1.05 | 0.822  | 0.541 |
| Ascorbate and aldarate metabolism                            | -1.02 | 0.802  | 0.535 |
| Pantothenate and CoA metabolism                              | 1.48  | 0.068  | 0.148 |
| Krebs cycle                                                  | -1.15 | 0.254  | 0.304 |
| Krebs cycle                                                  | 5.13  | <0.001 | 0.002 |
| Krebs cycle                                                  | 1.77  | <0.001 | 0.003 |
| Krebs cycle                                                  | -1.05 | 0.729  | 0.512 |
| Carnitine metabolism                                         | 1.37  | 0.057  | 0.138 |
| Carnitine metabolism                                         | 1.11  | 0.759  | 0.521 |
| Carnitine metabolism                                         | -1.14 | 0.271  | 0.314 |
| Fatty acid metabolism (also BCAA metabolism)                 | -1.08 | 0.700  | 0.502 |
| Fatty acid, monohydroxy                                      | -1.18 | 0.348  | 0.352 |
| Glycerolipid metabolism                                      | 1.03  | 0.776  | 0.527 |
| Glycerolipid metabolism                                      | -1.03 | 0.780  | 0.528 |
| Glycerolipid metabolism                                      | 1.35  | 0.159  | 0.233 |
| Inositol metabolism                                          | 1.15  | 0.298  | 0.328 |
| Ketone bodies                                                | 6.49  | <0.001 | 0.000 |
| Ketone bodies                                                | 2.90  | <0.001 | 0.005 |
| Ketone bodies                                                | 1.20  | 0.012  | 0.061 |
| Long chain fatty acid                                        | -1.08 | 0.725  | 0.510 |
| Medium chain fatty acid                                      | -1.12 | 0.441  | 0.390 |
| Medium chain fatty acid                                      | -1.16 | 0.334  | 0.345 |

|                                                             |       |        |       |
|-------------------------------------------------------------|-------|--------|-------|
| <b>Monoacylglycerol</b>                                     | -1.09 | 0.868  | 0.555 |
| <b>Sterol/Steroid</b>                                       | 1.20  | 0.379  | 0.364 |
| <b>Purine metabolism, (hypo)xanthine/inosine containing</b> | 1.30  | 0.013  | 0.065 |
| <b>Purine metabolism, (hypo)xanthine/inosine containing</b> | 1.13  | 0.390  | 0.369 |
| <b>Purine metabolism, (hypo)xanthine/inosine containing</b> | 1.25  | 0.047  | 0.129 |
| <b>Purine metabolism, adenine containing</b>                | 1.57  | 0.029  | 0.105 |
| <b>Purine metabolism, guanine containing</b>                | 1.28  | 0.054  | 0.136 |
| <b>Purine metabolism, urate metabolism</b>                  | 1.13  | 0.358  | 0.356 |
| <b>Pyrimidine metabolism, cytidine containing</b>           | -1.05 | 0.651  | 0.483 |
| <b>Pyrimidine metabolism, uracil containing</b>             | -1.06 | 0.603  | 0.464 |
| <b>Pyrimidine metabolism, uracil containing</b>             | -1.10 | 0.195  | 0.264 |
| <b>Dipeptide</b>                                            | 1.14  | 0.641  | 0.479 |
| <b>Dipeptide derivative</b>                                 | 2.56  | <0.001 | 0.003 |

Supplemental Digital Content 7. Alterations in the CSF metabolome of HIV patients not on ART (n=10) compared to HIV-negative controls matched by age and gender (n=10) shown in the total dataset of metabolites detected across HIV and Aging cohorts following data pre-processing. Significantly altered metabolites were defined by a fold change (FC) >1.2, p-value <0.01 and FDR <0.05.

| BIOCHEMICAL                                     | SUPER_PATHWAY          | SUB_PATHWAY                                           | FC    | p-value | q-value |
|-------------------------------------------------|------------------------|-------------------------------------------------------|-------|---------|---------|
| 3-ureidopropionate                              | Amino acid             | Alanine and aspartate metabolism                      | 1.37  | 0.055   | 0.124   |
| lysine                                          | Amino acid             | Alanine and aspartate metabolism                      | 1.18  | 0.076   | 0.142   |
| asparagine                                      | Amino acid             | Alanine and aspartate metabolism                      | -1.08 | 0.862   | 0.592   |
| N-acetylaniline                                 | Amino acid             | Alanine and aspartate metabolism                      | 1.23  | 0.060   | 0.129   |
| N-acetylaspartate (NAA)                         | Amino acid             | Alanine and aspartate metabolism                      | 2.17  | 0.089   | 0.157   |
| 2-aminobutyrate                                 | Amino acid             | Butanoate metabolism                                  | -1.01 | 0.410   | 0.409   |
| creatine                                        | Amino acid             | Creatine metabolism                                   | -1.03 | 0.263   | 0.308   |
| creatinine                                      | Amino acid             | Creatine metabolism                                   | -1.05 | 0.971   | 0.621   |
| 2-hydroxybutyrate (AHB)                         | Amino acid             | Cysteine, methionine, SAM, taurine metabolism         | 1.10  | 0.773   | 0.566   |
| methionine                                      | Amino acid             | Cysteine, methionine, SAM, taurine metabolism         | -1.07 | 0.191   | 0.251   |
| glutamate                                       | Amino acid             | Glutamate metabolism                                  | 3.33  | 0.003   | 0.018   |
| glutamine                                       | Amino acid             | Glutamate metabolism                                  | -1.04 | 0.527   | 0.471   |
| N-acetyl-aspartyl-glutamate (NAAG)              | Amino acid             | Glutamate metabolism                                  | 1.49  | 0.253   | 0.301   |
| 5-oxoprolin                                     | Amino acid             | Glutathione metabolism                                | -1.33 | 0.046   | 0.114   |
| betaine                                         | Amino acid             | Glycine, serine and threonine metabolism              | 1.29  | 0.004   | 0.021   |
| glycine                                         | Amino acid             | Glycine, serine and threonine metabolism              | 1.27  | 0.059   | 0.128   |
| N-acetyserine                                   | Amino acid             | Glycine, serine and threonine metabolism              | 1.35  | 0.065   | 0.133   |
| N-acetylthreonine                               | Amino acid             | Glycine, serine and threonine metabolism              | 1.11  | 0.388   | 0.396   |
| serine                                          | Amino acid             | Glycine, serine and threonine metabolism              | 1.13  | 0.688   | 0.537   |
| threonine                                       | Amino acid             | Glycine, serine and threonine metabolism              | -1.09 | 0.294   | 0.332   |
| 4-acetamidobutanoate                            | Amino acid             | Guanine and acetamide metabolism                      | 1.05  | 0.640   | 0.519   |
| N-acetyl-3-methylhistidine                      | Amino acid             | Histidine metabolism                                  | 1.72  | 0.290   | 0.328   |
| lysine                                          | Amino acid             | Lysine metabolism                                     | 1.17  | 0.849   | 0.589   |
| 3-(4-hydroxyphenyl)lactate                      | Amino acid             | Phenylalanine & tyrosine metabolism                   | 1.50  | 0.026   | 0.083   |
| p-cresol sulfate                                | Amino acid             | Phenylalanine & tyrosine metabolism                   | 1.52  | 0.047   | 0.115   |
| phenol sulfate                                  | Amino acid             | Phenylalanine & tyrosine metabolism                   | 1.62  | 0.028   | 0.087   |
| phenylacetylglutamine                           | Amino acid             | Phenylalanine & tyrosine metabolism                   | 1.69  | 0.013   | 0.018   |
| phenylalanine                                   | Amino acid             | Phenylalanine & tyrosine metabolism                   | 1.27  | 0.063   | 0.131   |
| tyrosine                                        | Amino acid             | Phenylalanine & tyrosine metabolism                   | 1.19  | 0.086   | 0.153   |
| 5-methylthioadenosine (MTA)                     | Amino acid             | Polyamine metabolism                                  | -1.27 | 0.177   | 0.240   |
| 5-hydroxyindoleacetate                          | Amino acid             | Tryptophan metabolism                                 | 1.23  | 0.203   | 0.259   |
| C-glycosyltryptophan*                           | Amino acid             | Tryptophan metabolism                                 | 1.24  | 0.108   | 0.178   |
| kyurenine                                       | Amino acid             | Tryptophan metabolism                                 | 2.27  | 0.004   | 0.021   |
| tryptophan                                      | Amino acid             | Tryptophan metabolism                                 | 1.09  | 0.371   | 0.385   |
| tryptophan betaine                              | Amino acid             | Tryptophan metabolism                                 | 1.16  | 0.364   | 0.380   |
| arginine                                        | Amino acid             | Urea cycle: arginine-, proline-, metabolism           | -1.03 | 0.475   | 0.445   |
| dimethylarginine (SDMA + ADMA)                  | Amino acid             | Urea cycle: arginine-, proline-, metabolism           | 1.23  | 0.076   | 0.142   |
| proline                                         | Amino acid             | Urea cycle: arginine-, proline-, metabolism           | 2.19  | <0.001  | <0.001  |
| trans-4-hydroxyproline                          | Amino acid             | Urea cycle: arginine-, proline-, metabolism           | 1.25  | 0.363   | 0.380   |
| urea                                            | Amino acid             | Urea cycle: arginine-, proline-, metabolism           | 1.14  | 0.201   | 0.258   |
| 3-hydroxy-2-ethylpropionate                     | Amino acid             | Valine, leucine and isoleucine metabolism             | 1.55  | 0.401   | 0.403   |
| 3-hydroxyisobutyrate                            | Amino acid             | Valine, leucine and isoleucine metabolism             | 1.28  | 0.130   | 0.199   |
| 3-methyl-2-oxobutyrate                          | Amino acid             | Valine, leucine and isoleucine metabolism             | -1.45 | 0.042   | 0.109   |
| 3-methyl-2-oxovalerate                          | Amino acid             | Valine, leucine and isoleucine metabolism             | -1.05 | 0.944   | 0.614   |
| 4-methyl-2-oxopentanoate                        | Amino acid             | Valine, leucine and isoleucine metabolism             | -1.17 | 0.814   | 0.509   |
| alpha-hydroxyisovalerate                        | Amino acid             | Valine, leucine and isoleucine metabolism             | 1.27  | 0.259   | 0.318   |
| beta-hydroxyisovalerate                         | Amino acid             | Valine, leucine and isoleucine metabolism             | -1.06 | 0.541   | 0.477   |
| isobutyrylcarnitine                             | Amino acid             | Valine, leucine and isoleucine metabolism             | -1.00 | 0.919   | 0.608   |
| isoleucine                                      | Amino acid             | Valine, leucine and isoleucine metabolism             | 1.07  | 0.949   | 0.615   |
| leucine                                         | Amino acid             | Valine, leucine and isoleucine metabolism             | 1.11  | 0.400   | 0.403   |
| N-acetylvaline                                  | Amino acid             | Valine, leucine and isoleucine metabolism             | 1.48  | 0.123   | 0.193   |
| valine                                          | Amino acid             | Valine, leucine and isoleucine metabolism             | 1.10  | 0.372   | 0.381   |
| erythronate*                                    | Carbohydrate           | Aminosugars metabolism                                | 1.11  | 0.527   | 0.471   |
| N-acetylneuraminate                             | Carbohydrate           | Aminosugars metabolism                                | 1.34  | 0.076   | 0.142   |
| 1,3-dihydroxyacetone                            | Carbohydrate           | Glycolysis, gluconeogenesis, pyruvate metabolism      | -1.08 | 0.593   | 0.500   |
| 1,5-anhydroglucitol (1,5-AG)                    | Carbohydrate           | Glycolysis, gluconeogenesis, pyruvate metabolism      | 1.17  | 0.726   | 0.550   |
| glycerate                                       | Carbohydrate           | Glycolysis, gluconeogenesis, pyruvate metabolism      | 1.04  | 0.921   | 0.608   |
| lactate                                         | Carbohydrate           | Glycolysis, gluconeogenesis, pyruvate metabolism      | 1.15  | 0.011   | 0.144   |
| pyruvate                                        | Carbohydrate           | Glycolysis, gluconeogenesis, pyruvate metabolism      | -1.22 | 0.385   | 0.394   |
| arabinose                                       | Carbohydrate           | Nucleotide sugars, pentose metabolism                 | 1.17  | 0.117   | 0.187   |
| arabitol                                        | Carbohydrate           | Nucleotide sugars, pentose metabolism                 | 1.10  | 0.665   | 0.529   |
| gluconate                                       | Carbohydrate           | Nucleotide sugars, pentose metabolism                 | -1.38 | 0.635   | 0.517   |
| ribitol                                         | Carbohydrate           | Nucleotide sugars, pentose metabolism                 | 1.08  | 0.485   | 0.450   |
| threitol                                        | Carbohydrate           | Nucleotide sugars, pentose metabolism                 | 1.42  | 0.005   | 0.023   |
| xyllitol                                        | Carbohydrate           | Nucleotide sugars, pentose metabolism                 | 1.50  | 0.102   | 0.172   |
| xylonate                                        | Carbohydrate           | Nucleotide sugars, pentose metabolism                 | 1.04  | 0.592   | 0.500   |
| xyllose                                         | Carbohydrate           | Nucleotide sugars, pentose metabolism                 | 1.33  | 0.150   | 0.218   |
| arabonate                                       | Cofactors and vitamins | Ascorbate and aldarate metabolism                     | 1.05  | 0.971   | 0.621   |
| threonate                                       | Cofactors and vitamins | Ascorbate and aldarate metabolism                     | 1.01  | 0.702   | 0.542   |
| pantothenate                                    | Cofactors and vitamins | Pantothenate and CoA metabolism                       | 1.56  | 0.005   | 0.023   |
| citrate                                         | Energy                 | Krebs cycle                                           | -1.15 | 0.208   | 0.281   |
| malate                                          | Energy                 | Krebs cycle                                           | 4.69  | <0.001  | <0.001  |
| succinate                                       | Energy                 | Krebs cycle                                           | 1.78  | <0.001  | <0.001  |
| succinylcarnitine                               | Energy                 | Krebs cycle                                           | 1.17  | 0.700   | 0.541   |
| 3-dehydrocarnitine*                             | Lipid                  | Carnitine metabolism                                  | 1.67  | 0.003   | 0.018   |
| acetylcarnitine                                 | Lipid                  | Carnitine metabolism                                  | 2.03  | 0.021   | 0.072   |
| carnitine                                       | Lipid                  | Carnitine metabolism                                  | 1.16  | 0.031   | 0.052   |
| propionylcarnitine                              | Lipid                  | Fatty acid metabolism (also BCAA metabolism)          | 1.50  | 0.057   | 0.126   |
| 3-hydroxypropanoate                             | Lipid                  | Fatty acid, monohydroxy                               | 1.56  | 0.335   | 0.361   |
| choline                                         | Lipid                  | Glycerolipid metabolism                               | 1.47  | 0.001   | 0.009   |
| glycerol                                        | Lipid                  | Glycerolipid metabolism                               | -1.07 | 0.469   | 0.442   |
| glycerol 3-phosphate (G3P)                      | Lipid                  | Glycerolipid metabolism                               | -1.04 | 0.965   | 0.619   |
| myo-inositol                                    | Lipid                  | Inositol metabolism                                   | 1.44  | 0.013   | 0.051   |
| 1,2-propanediol                                 | Lipid                  | Ketone bodies                                         | 3.34  | <0.001  | <0.001  |
| 3-hydroxybutyrate (BHBA)                        | Lipid                  | Ketone bodies                                         | 2.80  | <0.001  | <0.001  |
| acetoacetate                                    | Lipid                  | Ketone bodies                                         | 1.02  | 0.263   | 0.308   |
| arachidonate (20:4n6)                           | Lipid                  | Long chain fatty acid                                 | 1.19  | 0.514   | 0.464   |
| caprylate (8:0)                                 | Lipid                  | Medium chain fatty acid                               | 1.35  | 0.375   | 0.387   |
| 1-stearoylglycerol (1-monostearin)              | Lipid                  | Monoglycerol                                          | 2.36  | 0.461   | 0.437   |
| 7-alpha-hydroxy-3-oxo-4-cholestenolate (7-Hoca) | Lipid                  | Sterol/Steroid                                        | 1.03  | 0.416   | 0.412   |
| hypoxanthine                                    | Nucleotide             | Purine metabolism, (hypo) xanthine/inosine containing | 1.11  | 0.377   | 0.389   |
| inosine                                         | Nucleotide             | Purine metabolism, (hypo) xanthine/inosine containing | -1.10 | 0.287   | 0.326   |
| xanthine                                        | Nucleotide             | Purine metabolism, (hypo) xanthine/inosine containing | 1.10  | 0.179   | 0.242   |
| adenine                                         | Nucleotide             | Purine metabolism, adenine containing                 | 1.12  | 1.000   | 0.628   |
| N6-carbamoylthreonyladenosine                   | Nucleotide             | Purine metabolism, guanine containing                 | 1.29  | 0.046   | 0.114   |
| urate                                           | Nucleotide             | Purine metabolism, urate metabolism                   | 1.25  | 0.039   | 0.106   |
| cytidine                                        | Nucleotide             | Pyrimidine metabolism, cytidine containing            | -1.12 | 0.471   | 0.443   |
| pseudouridine                                   | Nucleotide             | Pyrimidine metabolism, uracil containing              | 1.15  | 0.178   | 0.241   |
| uridine                                         | Nucleotide             | Pyrimidine metabolism, uracil containing              | -1.06 | 0.538   | 0.476   |
| cyclo(leu-pro)                                  | Peptide                | Dipeptide                                             | 1.40  | 0.135   | 0.204   |
| homocarnosine                                   | Peptide                | Dipeptide derivative                                  | 1.72  | 0.004   | 0.021   |



Supplemental Digital Content 8 Alterations in the HIV CSF metabolome overlap with those associated with normal aging in HIV-negative controls: A fold change analysis of young (< age 50) vs. old (> age 50) HIV-negative controls and young HIV (age <50) subjects on ART vs. young HIV-negative controls. Young (n=23) and older (n=23) HIV-negative controls were matched by gender and race. Young HIV-negative subjects (n=23) were matched by age and gender. Significantly altered metabolites were defined by a fold change  $\geq 1.2$ , p<0.05, and q<0.10.

| BIOCHEMICAL                                 | SUPER PATHWAY          | SUB PATHWAY                                         | Older HIV-negative subjects vs. Young HIV-negative subjects |         | Young HIV-positive subjects vs. Young HIV-negative subjects |         |
|---------------------------------------------|------------------------|-----------------------------------------------------|-------------------------------------------------------------|---------|-------------------------------------------------------------|---------|
|                                             |                        |                                                     | FC                                                          | p-value | FC                                                          | p-value |
| BIOCHEMICAL                                 |                        |                                                     |                                                             |         |                                                             |         |
| 3-ureidopyrroline                           | Amino acid             | Alanine and aspartate metabolism                    | 1.75                                                        | 0.0078  | 0.0221                                                      | <0.001  |
| alanine                                     | Amino acid             | Alanine and aspartate metabolism                    | 1.13                                                        | 0.3728  | 0.2033                                                      | 1.12    |
| asparagine                                  | Amino acid             | Alanine and aspartate metabolism                    | 1.43                                                        | 0.0258  | 0.0410                                                      | 1.15    |
| Neocysteamine                               | Amino acid             | Alanine and aspartate metabolism                    | 1.89                                                        | 0.0076  | 0.0218                                                      | 1.16    |
| Neocysteamine (NAA)                         | Amino acid             | Alanine and aspartate metabolism                    | 1.06                                                        | 0.8707  | 0.9620                                                      | 1.56    |
| 5-oxoprolidone                              | Amino acid             | Biogenic amine metabolism                           | 1.43                                                        | 0.0148  | 0.0308                                                      | 1.11    |
| creatine                                    | Amino acid             | Creatine metabolism                                 | 1.05                                                        | 0.1338  | 0.1170                                                      | 1.04    |
| 2-hydroxybutyrate (AHB)                     | Amino acid             | Glutamine                                           | 1.45                                                        | 0.0088  | 0.0141                                                      | 1.06    |
| methionine                                  | Amino acid             | Cystine, methionine, SAM, biogenic amine metabolism | 1.11                                                        | 0.0580  | 0.0840                                                      | 1.02    |
| glutamate                                   | Amino acid             | Glutamate metabolism                                | 1.73                                                        | 0.0098  | 0.0497                                                      | 1.03    |
| glutamine                                   | Amino acid             | Glutamate metabolism                                | 1.23                                                        | 0.0876  | 0.0890                                                      | 1.10    |
| N-acetyl-aspartyl-glutamate (NAG)           | Amino acid             | Glutamate metabolism                                | 1.22                                                        | 0.2814  | 0.1793                                                      | 1.02    |
| 5-oxoproline                                | Amino acid             | Glutathione metabolism                              | 1.48                                                        | 0.0010  | 0.0092                                                      | <0.001  |
| betaine                                     | Amino acid             | Glycine, serine and threonine metabolism            | 1.13                                                        | 0.1799  | 0.1699                                                      | 1.19    |
| glycine                                     | Amino acid             | Glycine, serine and threonine metabolism            | 1.13                                                        | 0.3928  | 0.2077                                                      | 1.16    |
| N-acetylaspartate                           | Amino acid             | Glycine, serine and threonine metabolism            | 1.11                                                        | 0.1637  | 0.1332                                                      | 1.14    |
| N-acetylthreonine                           | Amino acid             | Glycine, serine and threonine metabolism            | 1.23                                                        | 0.0062  | 0.0038                                                      | <0.001  |
| serine                                      | Amino acid             | Glycine, serine and threonine metabolism            | 1.12                                                        | 0.4070  | 0.2196                                                      | 1.07    |
| threonine                                   | Amino acid             | Glycine, serine and threonine metabolism            | 1.12                                                        | 0.4698  | 0.2465                                                      | 1.02    |
| 4-acetamidobutanoate                        | Amino acid             | Glutathione and acetamide metabolism                | 1.03                                                        | 0.8990  | 0.3130                                                      | 1.08    |
| N-acetyl-3-methylhistidine                  | Amino acid             | Histidine metabolism                                | 1.46                                                        | 0.0396  | 0.0304                                                      | 1.16    |
| lysine                                      | Amino acid             | Lyxine metabolism                                   | 1.11                                                        | 0.5639  | 0.3888                                                      | <0.02   |
| 2,4-dihydroxybutanoate                      | Amino acid             | Phenylalanine & tyrosine metabolism                 | 1.48                                                        | 0.0095  | 0.0058                                                      | <0.001  |
| p-coumaric sulfate                          | Amino acid             | Phenylalanine & tyrosine metabolism                 | 1.34                                                        | 0.1747  | 0.1385                                                      | 1.03    |
| phenol sulfate                              | Amino acid             | Phenylalanine & tyrosine metabolism                 | 1.27                                                        | 0.1537  | 0.1384                                                      | 1.45    |
| phenylethylamine                            | Amino acid             | Phenylalanine & tyrosine metabolism                 | 1.06                                                        | 0.9163  | 0.8295                                                      | 1.80    |
| phenylalanine                               | Amino acid             | Phenylalanine & tyrosine metabolism                 | 1.49                                                        | 0.0763  | 0.0921                                                      | 1.00    |
| tyrosine                                    | Amino acid             | Phenylalanine & tyrosine metabolism                 | 1.06                                                        | 0.7484  | 0.3872                                                      | 1.14    |
| 5-methylthioadenosine (MTA)                 | Amino acid             | Polyamine metabolism                                | 1.17                                                        | 0.2089  | 0.1533                                                      | <0.20   |
| 5-hydroxyindoleacetate                      | Amino acid             | Tryptophan metabolism                               | 1.07                                                        | 0.3403  | 0.1984                                                      | 1.02    |
| C-allysilytryptophan                        | Amino acid             | Tryptophan metabolism                               | 1.25                                                        | 0.0070  | 0.0215                                                      | 1.13    |
| tryptophan                                  | Amino acid             | Tryptophan metabolism                               | 1.05                                                        | 0.4129  | 0.1244                                                      | 1.19    |
| tryptophan beta-ine                         | Amino acid             | Tryptophan metabolism                               | 1.03                                                        | 0.8337  | 0.3021                                                      | 1.09    |
| arginine                                    | Amino acid             | Urea cycle: arginine, proline, metabolism           | 1.02                                                        | 0.9126  | 0.3790                                                      | <0.12   |
| dimethylarginine (DMA + ADMA)               | Amino acid             | Urea cycle: arginine, proline, metabolism           | 1.22                                                        | 0.0086  | 0.0338                                                      | 1.07    |
| proline                                     | Amino acid             | Urea cycle: arginine, proline, metabolism           | 1.16                                                        | 0.2411  | 0.1749                                                      | <0.001  |
| trans-4-hydroxyproline                      | Amino acid             | Urea cycle: arginine, proline, metabolism           | 1.11                                                        | 0.8762  | 0.3059                                                      | 1.09    |
| urea                                        | Amino acid             | Urea cycle: arginine, proline, metabolism           | 1.23                                                        | 0.0227  | 0.0207                                                      | <0.001  |
| 3-hydroxy-2-ethylpyrroline                  | Amino acid             | Valine, leucine and isoleucine metabolism           | 1.20                                                        | 0.4461  | 0.2253                                                      | 1.10    |
| 3-hydroxyisobutyrate                        | Amino acid             | Valine, leucine and isoleucine metabolism           | 1.26                                                        | 0.0170  | 0.0322                                                      | <0.001  |
| 3-methyl-2-oxobutyrate                      | Amino acid             | Valine, leucine and isoleucine metabolism           | 1.09                                                        | 0.3028  | 0.1698                                                      | 1.08    |
| 4-methyl-2-oxopentanoate                    | Amino acid             | Valine, leucine and isoleucine metabolism           | 1.26                                                        | 0.0384  | 0.0491                                                      | 1.12    |
| alpha-hydroxyisovalerate                    | Amino acid             | Valine, leucine and isoleucine metabolism           | 1.25                                                        | 0.0388  | 0.0487                                                      | 1.09    |
| beta-hydroxyisovalerate                     | Amino acid             | Valine, leucine and isoleucine metabolism           | 1.37                                                        | 0.2556  | 0.1709                                                      | 1.02    |
| isochrysin                                  | Amino acid             | Valine, leucine and isoleucine metabolism           | 1.31                                                        | 0.0281  | 0.0427                                                      | 1.08    |
| isoflavanone                                | Amino acid             | Valine, leucine and isoleucine metabolism           | 1.27                                                        | 0.0671  | 0.0733                                                      | 1.01    |
| isoflavone                                  | Amino acid             | Valine, leucine and isoleucine metabolism           | 1.13                                                        | 0.3328  | 0.1637                                                      | 1.14    |
| leucine                                     | Amino acid             | Valine, leucine and isoleucine metabolism           | 1.11                                                        | 0.2315  | 0.1024                                                      | 0.9897  |
| neochrysin                                  | Amino acid             | Valine, leucine and isoleucine metabolism           | 1.06                                                        | 0.8042  | 0.2823                                                      | 1.17    |
| valine                                      | Amino acid             | Valine, leucine and isoleucine metabolism           | 1.28                                                        | 0.2688  | 0.1747                                                      | 0.973   |
| erythronate                                 | Carbohydrate           | Aminosugars metabolism                              | 1.03                                                        | 0.9143  | 0.4095                                                      | <0.02   |
| N-acetylneuraminate                         | Carbohydrate           | Aminosugars metabolism                              | 1.19                                                        | 0.1607  | 0.1278                                                      | 1.17    |
| 1,3-bisphosphoglycerate                     | Carbohydrate           | Glycolysis, gluconeogenesis, pyruvate metabolism    | 1.14                                                        | 0.6032  | 0.2822                                                      | <0.40   |
| 1,6-bisphosphoglycerate (1,6-BPG)           | Carbohydrate           | Glycolysis, gluconeogenesis, pyruvate metabolism    | 1.13                                                        | 0.3835  | 0.2057                                                      | <0.03   |
| glycerate                                   | Carbohydrate           | Glycolysis, gluconeogenesis, pyruvate metabolism    | 1.30                                                        | 0.0037  | 0.0173                                                      | 1.12    |
| lactate                                     | Carbohydrate           | Glycolysis, gluconeogenesis, pyruvate metabolism    | 1.19                                                        | 0.0028  | 0.0148                                                      | 1.19    |
| glyoxylate                                  | Carbohydrate           | Glycolysis, gluconeogenesis, pyruvate metabolism    | 1.04                                                        | 0.8620  | 0.3059                                                      | 1.27    |
| arabinose                                   | Carbohydrate           | Nucleotide sugars, pentose metabolism               | 1.23                                                        | 0.0094  | 0.0227                                                      | 1.17    |
| arabinol                                    | Carbohydrate           | Nucleotide sugars, pentose metabolism               | 1.26                                                        | 0.0432  | 0.0638                                                      | 1.02    |
| glucosate                                   | Carbohydrate           | Nucleotide sugars, pentose metabolism               | 1.12                                                        | 0.8401  | 0.2844                                                      | <0.12   |
| ribose                                      | Carbohydrate           | Nucleotide sugars, pentose metabolism               | 1.25                                                        | 0.0401  | 0.0516                                                      | 1.08    |
| brivostol                                   | Carbohydrate           | Nucleotide sugars, pentose metabolism               | 1.54                                                        | 0.0003  | 0.0074                                                      | 1.34    |
| xylooligosaccharide                         | Carbohydrate           | Nucleotide sugars, pentose metabolism               | 1.08                                                        | 0.6670  | 0.3028                                                      | 1.08    |
| xylofuranose                                | Carbohydrate           | Nucleotide sugars, pentose metabolism               | 1.43                                                        | 0.0012  | 0.0094                                                      | 1.01    |
| xylose                                      | Carbohydrate           | Nucleotide sugars, pentose metabolism               | 1.24                                                        | 0.1038  | 0.1221                                                      | 1.03    |
| ascorbate                                   | Cofactors and vitamins | Ascorbate and ideone metabolism                     | 1.17                                                        | 0.0238  | 0.0111                                                      | 1.01    |
| threonate                                   | Cofactors and vitamins | Ascorbate and ideone metabolism                     | 1.17                                                        | 0.2648  | 0.1741                                                      | 1.29    |
| panthothenate                               | Cofactors and vitamins | Pantothenate and CoA metabolism                     | 1.17                                                        | 0.4000  | 0.2026                                                      | 1.14    |
| citrate                                     | Energy                 | Krebs cycle                                         | 1.17                                                        | 0.1667  | 0.0845                                                      | <0.07   |
| malate                                      | Energy                 | Krebs cycle                                         | 1.13                                                        | 0.3000  | 0.2027                                                      | 0.9903  |
| succinate                                   | Energy                 | Krebs cycle                                         | 1.20                                                        | 0.0480  | 0.0556                                                      | 1.09    |
| acetylcholinesterase                        | Lipid                  | Krebs cycle                                         | 1.00                                                        | 0.9788  | 0.3894                                                      | 1.02    |
| 3-hydroxyoctanoate                          | Lipid                  | Carbonyl metabolism                                 | 1.11                                                        | 0.3945  | 0.2081                                                      | 1.22    |
| acetylcholinesterase                        | Lipid                  | Carbonyl metabolism                                 | 1.06                                                        | 0.8070  | 0.3449                                                      | 1.21    |
| carotene                                    | Lipid                  | Carbonyl metabolism                                 | 1.15                                                        | 0.1088  | 0.1035                                                      | <0.01   |
| p-propranolol                               | Lipid                  | Fatty acid metabolism (beta-oxidation)              | 1.16                                                        | 0.2873  | 0.1748                                                      | 1.38    |
| 3-hydroxyoctanoate                          | Lipid                  | Fatty acid, monohydroxy                             | 1.22                                                        | 0.1500  | 0.1266                                                      | 1.07    |
| choline                                     | Lipid                  | Glycerolipid metabolism                             | 1.34                                                        | 0.0004  | 0.0074                                                      | 1.10    |
| glycerol                                    | Lipid                  | Glycerolipid metabolism                             | 1.24                                                        | 0.2004  | 0.1798                                                      | 1.00    |
| glycerol 3-phosphate (G3P)                  | Lipid                  | Glycerolipid metabolism                             | 1.08                                                        | 0.6945  | 0.3116                                                      | 1.28    |
| lyso-phosphatidylcholine                    | Lipid                  | lysine metabolism                                   | 1.00                                                        | 0.9692  | 0.4126                                                      | 1.03    |
| 1,3-bisphosphoglycerate                     | Lipid                  | lysine metabolism                                   | 1.08                                                        | 0.4282  | 0.0775                                                      | 1.04    |
| 3-hydroxybutyrate (BHA)                     | Lipid                  | ketone bodies                                       | 1.84                                                        | 0.0402  | 0.0217                                                      | <0.001  |
| acetooacetate                               | Lipid                  | ketone bodies                                       | 1.10                                                        | 0.4968  | 0.2445                                                      | 1.07    |
| arachidonate (20:4n-6)                      | Lipid                  | Long chain fatty acid                               | 1.53                                                        | 0.0126  | 0.0277                                                      | 1.21    |
| caproate (6:0)                              | Lipid                  | Medium chain fatty acid                             | 1.18                                                        | 0.4702  | 0.1763                                                      | 1.45    |
| 1-stearoylglycerol (1 monoolearin)          | Lipid                  | Monocacylglycerol                                   | 1.69                                                        | 0.1072  | 0.1024                                                      | 1.19    |
| 7-alpha-hydroxy-3-oxo-cholestanone (7-HCCA) | Lipid                  | Steroid                                             | 1.09                                                        | 0.6687  | 0.2847                                                      | 1.03    |
| hypoxanthine                                | Nucleotide             | Purine metabolism, hypoxanthiniminosine containing  | 1.33                                                        | 0.0229  | 0.0385                                                      | 1.15    |
| inosine                                     | Nucleotide             | Purine metabolism, hypoxanthiniminosine containing  | 1.11                                                        | 0.3323  | 0.1698                                                      | 1.13    |
| adenosine                                   | Nucleotide             | Purine metabolism, hypoxanthiniminosine containing  | 1.04                                                        | 0.5036  | 0.2962                                                      | 1.10    |
| adenine                                     | Nucleotide             | Purine metabolism, adenine containing               | 1.08                                                        | 0.5661  | 0.2895                                                      | 1.08    |
| N6-carbamoyl-uridylic-acid                  | Nucleotide             | Purine metabolism, uracil containing                | 1.16                                                        | 0.1617  | 0.1327                                                      | 1.17    |
| urate                                       | Nucleotide             | Purine metabolism, urate metabolism                 | 1.42                                                        | 0.0043  | 0.0183                                                      | 1.24    |
| cytosine                                    | Nucleotide             | Pyrimidine metabolism, cytosine containing          | 1.03                                                        | 0.3901  | 0.2084                                                      | <0.07   |
| psitiduridine                               | Nucleotide             | Pyrimidine metabolism, uracil containing            | 1.26                                                        | 0.0009  | 0.0091                                                      | 1.08    |
| uridine                                     | Nucleotide             | Pyrimidine metabolism, uracil containing            | 1.06                                                        | 0.3998  | 0.2072                                                      | 1.07    |
| cyclodextrin                                | Peptide                | Dipeptide                                           | 1.18                                                        | 0.3268  | 0.1918                                                      | 1.02    |
| homocarnosine                               | Peptide                | Dipeptide derivative                                | 1.43                                                        | 0.0292  | 0.0428                                                      | 1.87    |



**Supplemental Digital Content 10 (Figure).** Metabolite pathways enriched in HIV subjects on ART. Quantitative Enrichment Analysis (QEA) was performed using metabolite set enrichment analysis (MSEA). QEA is based on the globaltest algorithm which uses a generalized linear model to estimate a Q-statistic for each metabolite set. CSF metabolites (n=107) from HIV-negative controls (n=14) and HIV subjects on ART with (n=12) and without (n=14) NCI and low plasma viral loads (VL<10,000 copies/ml) were inputted into MSEA and enrichment was assessed using the MSEA Metabolic Pathway library (n=88). Pathways were considered enriched when  $p < 0.05$  and FDR < 5%.

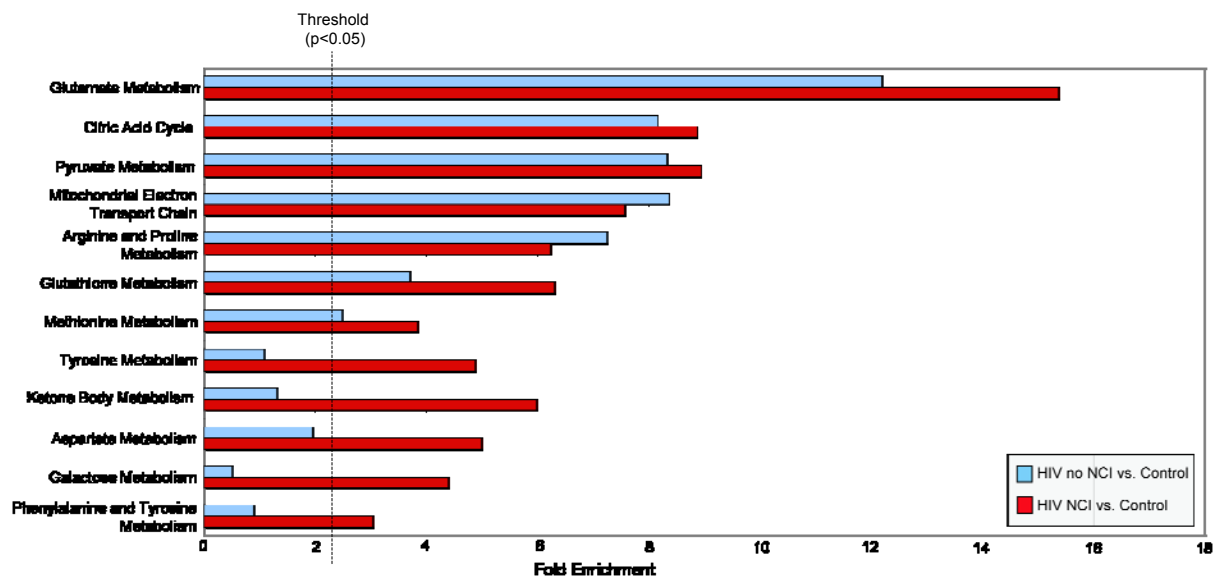

Supplement: aids-28-1579-s001.pdf [file aids-28-1579-s001.pdf]
